# Supplementary material
Source: PubMed Central journal article supplement (PMC3719574)
Supplement: IAI.00415-13_zii999090246so1.pdf [file IAI.00415-13_zii999090246so1.pdf]

**Table S1**  
**The effect of temperature on binding of six strains of *C. jejuni* to natural mucins on a mucin microarray**

| Mucin Source                         | <i>C. jejuni</i> strain 81-176 |       | 11168 |       | CC18  |       | CC19  |       | H1    |       | H3    |       |       |
|--------------------------------------|--------------------------------|-------|-------|-------|-------|-------|-------|-------|-------|-------|-------|-------|-------|
|                                      | Temperature                    | 37°C  | 42°C  |
| Bovine Abomasum                      |                                | 2780  | 3563  | 1903  | 3011  | 3496  | 3312  | 2750  | 3643  | 2337  | 2715  | 2459  | 1999  |
| Bovine Cervico-Vaginal               |                                | 472   | 585   | 623   | 334   | 535   | 645   | 354   | 433   | 543   | 624   | 535   | 477   |
| Bovine Cervix                        |                                | 497   | 433   | 398   | 443   | 543   | 678   | 545   | 366   | 232   | 535   | 443   | 642   |
| Bovine Duodenum                      |                                | 795   | 559   | 848   | 844   | 834   | 864   | 855   | 785   | 922   | 748   | 634   | 867   |
| Bovine Spiral Colon                  |                                | 1131  | 1021  | 1088  | 1053  | 1026  | 1192  | 1201  | 1183  | 1155  | 1012  | 1251  | 1200  |
| Bovine Trachea                       |                                | 533   | 605   | 404   | 574   | 550   | 404   | 592   | 599   | 601   | 440   | 491   | 501   |
| Bovine Endometrium                   |                                | 554   | 530   | 626   | 510   | 593   | 526   | 501   | 553   | 494   | 440   | 601   | 502   |
| Chicken Cecum                        |                                | 3884  | 4955  | 4293  | 3943  | 4012  | 3112  | 3993  | 4202  | 3325  | 3930  | 3495  | 4026  |
| Chicken Proximal Small Intestine     |                                | 8775  | 9023  | 9024  | 8234  | 8350  | 8153  | 8334  | 8530  | 8493  | 8993  | 9211  | 9002  |
| Chicken Large Intestine              |                                | 14344 | 13902 | 15331 | 14495 | 15343 | 16011 | 14650 | 15355 | 14553 | 15323 | 14013 | 14563 |
| Deer Abomasum                        |                                | 2021  | 2102  | 1974  | 2587  | 2487  | 2683  | 1987  | 1975  | 2528  | 2012  | 1973  | 2879  |
| Deer Duodenum                        |                                | 121   | 188   | 90    | 153   | 189   | 148   | 14    | 83    | 87    | 183   | 91    | 91    |
| Deer Jejunum                         |                                | 144   | 204   | 214   | 158   | 159   | 109   | 122   | 158   | 153   | 109   | 150   | 153   |
| Deer Spiral Ascending Colon          |                                | 816   | 910   | 843   | 835   | 935   | 941   | 853   | 913   | 914   | 841   | 813   | 989   |
| HT29-MTX-E12 cells                   |                                | 3192  | 3045  | 3791  | 3791  | 4103  | 3158  | 3719  | 3799  | 3314  | 3914  | 3489  | 3809  |
| Equine Dorsal Ascending Colon        |                                | 925   | 882   | 953   | 834   | 913   | 891   | 981   | 801   | 984   | 984   | 981   | 834   |
| Equine Duodenum                      |                                | 1183  | 1301  | 1322  | 1879  | 948   | 1029  | 994   | 1357  | 1464  | 1598  | 1895  | 1754  |
| Equine Left Ventral Ascending Colon  |                                | 1883  | 2012  | 2014  | 2089  | 1830  | 1987  | 1793  | 1970  | 1873  | 1210  | 1309  | 1893  |
| Equine Right Ventral Ascending Colon |                                | 3255  | 3422  | 3109  | 3180  | 3148  | 3109  | 3170  | 3104  | 3805  | 3570  | 3809  | 3147  |
| Equine Jejunum                       |                                | 1891  | 1922  | 1937  | 1914  | 1957  | 1893  | 1997  | 1834  | 1410  | 1519  | 1893  | 1823  |
| Equine Stomach                       |                                | 218   | 319   | 401   | 146   | 149   | 143   | 134   | 192   | 292   | 243   | 298   | 109   |
| Equine Trachea                       |                                | 313   | 291   | 309   | 241   | 241   | 257   | 214   | 227   | 252   | 210   | 310   | 359   |
| LS174T cells                         |                                | 4298  | 3129  | 3158  | 3570  | 3015  | 3517  | 3170  | 4391  | 4513  | 4709  | 3914  | 4417  |

|                          |      |      |      |      |      |      |      |      |      |      |      |      |
|--------------------------|------|------|------|------|------|------|------|------|------|------|------|------|
| Mouse Cecum              | 483  | 529  | 440  | 501  | 512  | 410  | 409  | 401  | 391  | 519  | 480  | 487  |
| Mouse large Intestine    | 1001 | 1210 | 1144 | 1348 | 1529 | 1431 | 1414 | 1523 | 1312 | 1118 | 1409 | 1201 |
| Mouse Small Intestine    | 202  | 291  | 210  | 291  | 289  | 241  | 247  | 209  | 244  | 248  | 240  | 248  |
| Mouse Stomach            | 694  | 553  | 585  | 646  | 658  | 535  | 691  | 594  | 647  | 643  | 634  | 630  |
| Ovine Abomasum Antrum    | 343  | 422  | 367  | 374  | 363  | 455  | 358  | 458  | 444  | 398  | 458  | 346  |
| Ovine Descending Colon   | 866  | 829  | 814  | 941  | 901  | 791  | 770  | 942  | 912  | 888  | 841  | 848  |
| Ovine Duodenum           | 1576 | 1492 | 1784 | 1875 | 1874 | 1986 | 1987 | 1958 | 1763 | 1758 | 1644 | 1673 |
| Ovine Ileum              | 724  | 1022 | 809  | 893  | 934  | 895  | 986  | 972  | 852  | 879  | 863  | 998  |
| Ovine Jejunum            | 652  | 733  | 598  | 889  | 733  | 985  | 895  | 935  | 873  | 674  | 678  | 871  |
| Ovine Spiral Colon       | 2654 | 3822 | 3079 | 2063 | 3986 | 3964 | 3061 | 2794 | 2989 | 2869 | 3141 | 2986 |
| Porcine Cecum            | 4221 | 4292 | 4142 | 4014 | 4757 | 4894 | 4186 | 4870 | 4109 | 4171 | 4794 | 4014 |
| Porcine Descending Colon | 1423 | 1953 | 1773 | 1265 | 1655 | 1986 | 2025 | 1886 | 1722 | 1775 | 1636 | 1557 |
| Porcine Jejunum          | 1055 | 1293 | 1095 | 1098 | 1092 | 1071 | 906  | 998  | 859  | 894  | 906  | 994  |
| Porcine Spiral Colon     | 1211 | 1402 | 1265 | 1153 | 1862 | 1289 | 1165 | 1256 | 1152 | 1231 | 1545 | 1522 |
| Porcine Stomach          | 2522 | 3211 | 3636 | 2613 | 3856 | 2346 | 2751 | 2247 | 2272 | 2727 | 2134 | 2277 |
| Rat Cecum                | 1031 | 1320 | 937  | 993  | 917  | 974  | 1682 | 1277 | 1157 | 1156 | 1256 | 1163 |
| Rat Colon                | 1011 | 922  | 1111 | 1163 | 914  | 891  | 987  | 1176 | 1215 | 1151 | 913  | 910  |
| Rat Duodenum             | 902  | 645  | 742  | 586  | 946  | 272  | 468  | 409  | 640  | 358  | 994  | 843  |
| Rat Ileum                | 501  | 656  | 856  | 347  | 824  | 865  | 796  | 286  | 444  | 382  | 358  | 727  |
| Rat Stomach              | 1101 | 1204 | 1215 | 1098 | 916  | 1689 | 1189 | 1161 | 869  | 987  | 1094 | 1118 |

---

Binding of six strains of *C. jejuni*, including the well characterised 8176 and 1168 strains, two recent chicken isolates and two recent human clinical isolates, to native mucins printed on a microarray. Binding was tested at two different temperatures 37°C and 42°C. Values represent the mean fluorescent value from duplicate individual microarrays across 3 different array slides

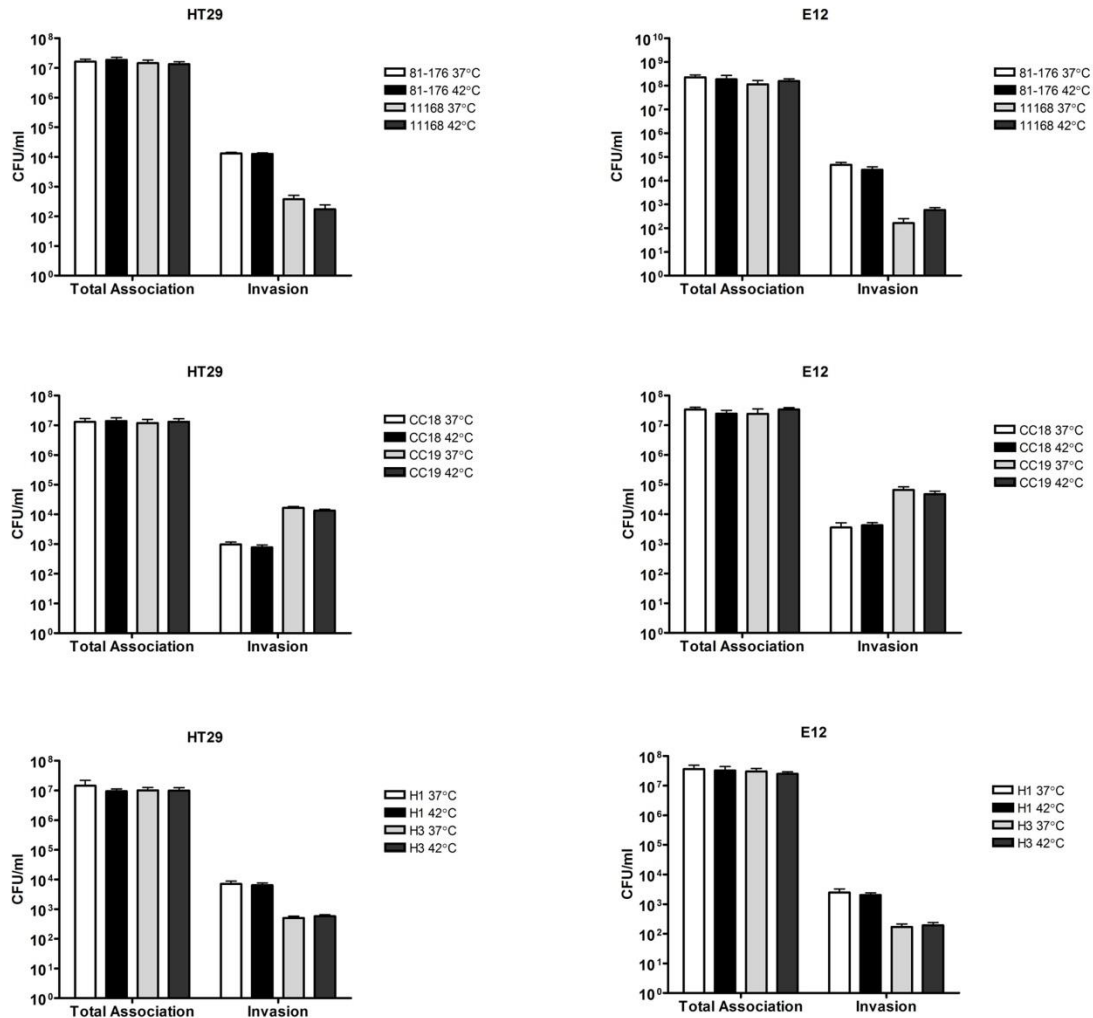

**Figure S1**

Effect of temperature on *C. jejuni* infection and invasion of colonic cell lines. To determine the effect of temperature on *C. jejuni* infection and invasion, 6 strains of *C. jejuni* were grown at 37°C or 42°C for 24 hours. HT29 and HT29-MTX-E12 cells grown for 21 days were infected with *C. jejuni* and incubated at either 37°C or 42°C for 4 hours. A total association assay was used to determine cell associated bacteria, invasion was quantified by enumeration of internalised bacteria following gentamicin treatment. Data are presented as mean  $\pm$  standard deviation (error bars).  $n=6$  for each group. Temperature had no significant impact on either total association or invasion of either cell line ( $p<0.001$ ).
